# Supplementary material
Source: PubMed Central journal article supplement (PMC8903963)

**Supplementary Table 1: Trend in the Indicators of Vaccine Eagerness Before and During the Second Wave of COVID-19 Pandemic**

| S.no | Indicators of Vaccine Eagerness                              | Round-1 (N=900) |      |           | Round-2 (N=861) |      |           |
|------|--------------------------------------------------------------|-----------------|------|-----------|-----------------|------|-----------|
|      |                                                              | N               | %    | 95% CI    | N               | %    | 95% CI    |
| 1.   | People who believed that COVID-19 vaccine is safe            | 687             | 76.3 | 73.4-79.1 | 579             | 67.3 | 63.9-70.3 |
| 2.   | People who knew that COVID-19 vaccine prevents the infection | 696             | 77.3 | 74.4-80.0 | 625             | 72.6 | 69.4-75.5 |
| 3.   | Willingness to pay for COVID-19 vaccine                      | 493             | 54.8 | 51.4-58.0 | 498             | 57.7 | 54.4-61.1 |
| 4.   | Vaccine hesitancy                                            | 250             | 27.8 | 24.9-30.8 | 282             | 32.7 | 29.7-35.9 |
| 5.   | Vaccine refusal                                              | 230             | 25.6 | 22.8-28.5 | 307             | 35.6 | 32.5-38.9 |

**Supplementary Table 2: Assessment of vaccine hesitancy using WHO SAGE questionnaire Before and During the Second Wave of COVID-19 Pandemic**

| Questions                                                                                       | Round 1 (n=900)            |                   |                  |                |                         | Round 2 (n=861)            |                   |                  |                |                         |
|-------------------------------------------------------------------------------------------------|----------------------------|-------------------|------------------|----------------|-------------------------|----------------------------|-------------------|------------------|----------------|-------------------------|
|                                                                                                 | Strongly Disagree<br>N (%) | Disagree<br>N (%) | Neutral<br>N (%) | Agree<br>N (%) | Strongly Agree<br>N (%) | Strongly Disagree<br>N (%) | Disagree<br>N (%) | Neutral<br>N (%) | Agree<br>N (%) | Strongly Agree<br>N (%) |
| Taking covid-19 vaccination is important for my health                                          | 11<br>(1.2)                | 62<br>(6.9)       | 230<br>(25.5)    | 534<br>(59.3)  | 63<br>(7.0)             | 11<br>(1.3)                | 61<br>(7.1)       | 219<br>(25.4)    | 507<br>(58.9)  | 63<br>(7.3)             |
| Covid-19 vaccine is effective                                                                   | 15<br>(1.7)                | 52<br>(5.8)       | 267<br>(29.7)    | 507<br>(56.3)  | 59<br>(6.6)             | 15<br>(1.7)                | 51<br>(5.9)       | 258<br>(29.9)    | 478<br>(55.5)  | 59<br>(6.8)             |
| Taking covid-19 vaccination is important for the health of others in my community               | 3<br>(0.3)                 | 19<br>(2.1)       | 199<br>(22.1)    | 564<br>(62.7)  | 115<br>(12.8)           | 3<br>(0.3)                 | 19<br>(2.2)       | 191<br>(22.2)    | 533<br>(61.9)  | 115<br>(13.4)           |
| Information I receive about vaccine from health provider & government is reliable & trustworthy | 15<br>(1.7)                | 58<br>(6.4)       | 239<br>(26.5)    | 520<br>(57.8)  | 68<br>(7.6)             | 15<br>(1.7)                | 58<br>(6.7)       | 231<br>(26.8)    | 490<br>(56.9)  | 67<br>(7.8)             |
| Getting vaccines is a good way to protect myself from disease                                   | 7<br>(0.8)                 | 31<br>(3.4)       | 221<br>(24.6)    | 582<br>(64.7)  | 59<br>(6.6)             | 7<br>(0.8)                 | 31<br>(3.6)       | 213<br>(24.7)    | 551<br>(64.0)  | 59<br>(6.8)             |

|                                                                                         |               |               |               |               |               |               |               |               |               |               |
|-----------------------------------------------------------------------------------------|---------------|---------------|---------------|---------------|---------------|---------------|---------------|---------------|---------------|---------------|
| Generally, I do what my doctor or health care provider recommends about vaccines for me | 3<br>(0.3)    | 40<br>(4.4)   | 168<br>(18.7) | 570<br>(63.3) | 119<br>(13.2) | 3<br>(0.3)    | 40<br>(4.6)   | 160<br>(18.6) | 539<br>(62.6) | 119<br>(13.8) |
| I am concerned about serious adverse effects of vaccines                                | 30<br>(3.3)   | 106<br>(11.8) | 474<br>(52.6) | 187<br>(20.8) | 103<br>(11.4) | 30<br>(3.5)   | 106<br>(12.3) | 437<br>(50.7) | 185<br>(21.5) | 103<br>(11.9) |
| I do not need vaccine for COVID-19, that is not common anymore                          | 100<br>(11.1) | 197<br>(21.9) | 500<br>(55.6) | 64<br>(7.1)   | 39<br>(4.3)   | 100<br>(11.6) | 189<br>(21.9) | 470<br>(54.6) | 63<br>(7.3)   | 39<br>(4.5)   |

**Supplementary Figure 1: Sampling strategy**

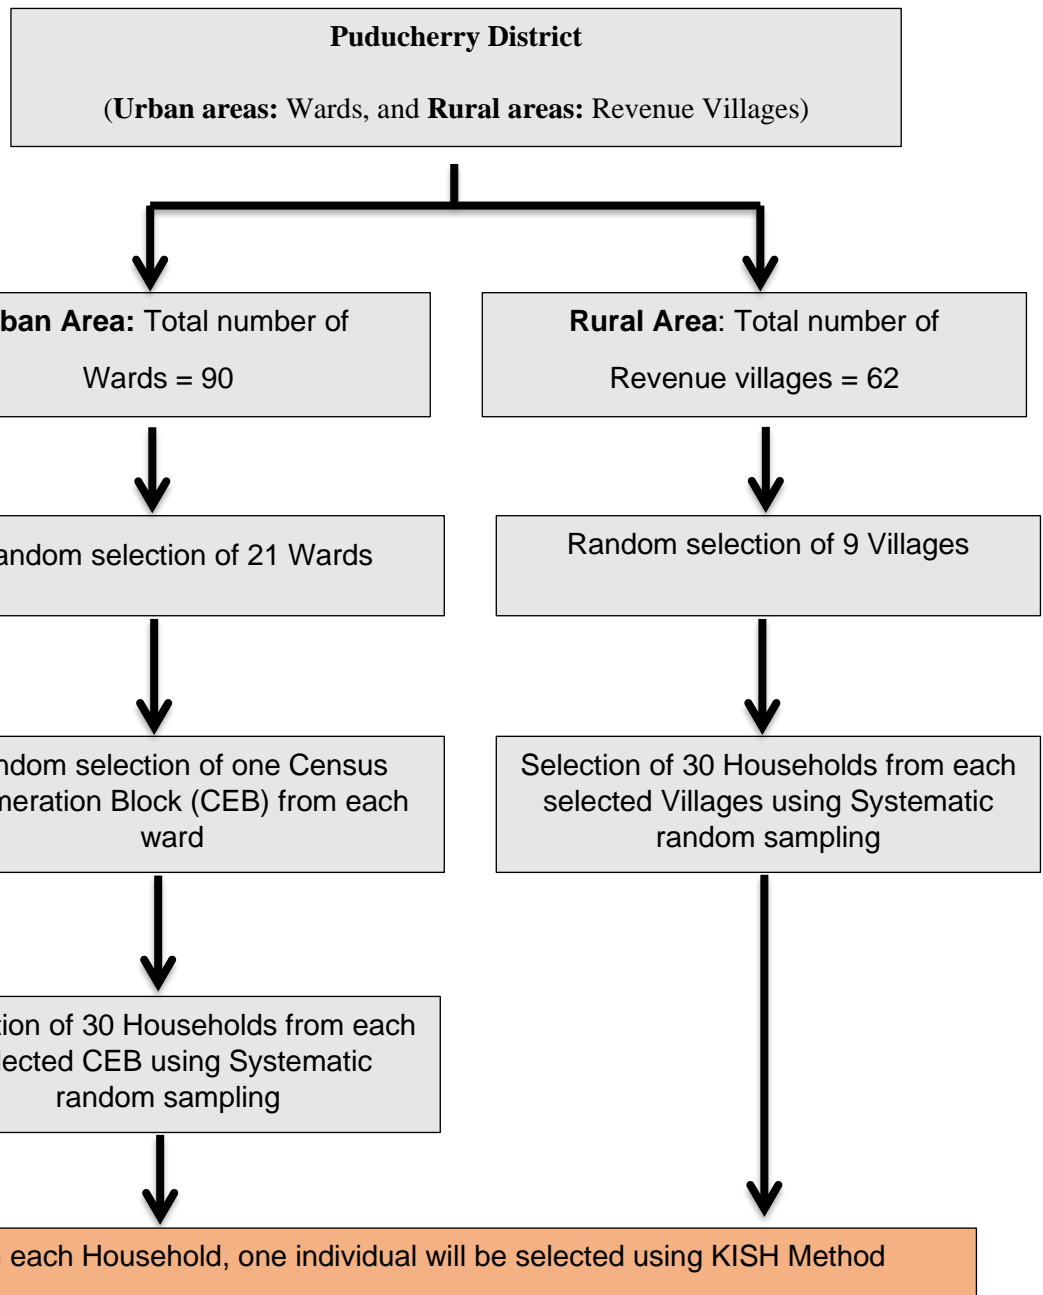

Supplement: KHVI_A_2000262_SM1187.pdf [file KHVI_A_2000262_SM1187.pdf]
